# Supplementary material
Source: PubMed Central journal article supplement (PMC3508754)
Supplement: supp_12-10793_IOVS-12-10793-s01.pdf [file supp_12-10793_IOVS-12-10793-s01.pdf]

## Supplementary Materials

*Tayebah Rezaie, Scott R. McKercher, Kunio Kosaka, Masaaki Seki, Larry Wheeler, Veena Viswanath, Teresa Chun, Rabina Joshi, Marcos Valencia, Shunsuke Sasaki, Terumasa Tozawad, Takumi Satoh, and Stuart A. Lipton*

## Supplementary Figure Legends

**FIGURE S1.** Carnosic acid (CA)-induced upregulation of anti-oxidant and ARE-related genes by microarray analysis. ARPE-19 cell lines were treated with CA or vehicle, and total RNA was extracted and used for expression analysis of ARE-related genes. Fold-change after CA treatment compared to vehicle is plotted.

**FIGURE S2.** Effect of CA on Nrf2 translocation into the nucleus of ARPE-19 cells. Retinal cells were treated with vehicle (**A**) or CA (**B**) for 24 hours. Cells were then fixed, processed for immunostaining, and Nrf2 protein visualized by FITC-conjugated secondary antibody. DNA was counterstained with Hoechst.

**FIGURE S3.** Concentration of CA in plasma and retina after intraperitoneal (i.p.) injection in rats. Liquid chromatography/mass spectrometry (LC/MS/MS) analysis of carnosic acid in plasma (**A**) and neural retina (**B**). Rats received one or two doses of CA at a concentration of 25 mg/kg/d by i.p. injection. Then, 24 hours after the last injection, plasma and neural retina were collected and analyzed for CA ( $n = 3$  for each group).

**FIGURE S4.** Retinal morphology in control animals treated with CA but not exposed to light. **(A)** Retinal ONL thickness in rats not exposed to light damage (LD) or drug. Values are mean + SEM. **(B)** ONL thickness for 3 groups of control rats: no LD-no treatment ( $n = 4$ ), no LD-Vehicle treatment ( $n = 4$ ), and no LD-CA treatment ( $n = 4$ ). Values represent mean  $\pm$  SEM. Groups were compared by two-way ANOVA and found not to be significantly different ( $P > 0.05$ ).

**FIGURE S5.** Cell death detected by TUNEL analysis in the ONL of rat retinas. **(A and B)** Photomicrographs of retinal sections from rats exposed to damaging light and treated with vehicle **(A)** or CA **(B)**. Apoptotic TUNEL-positive cells (red), DNA stained with Hoechst (blue). **(C)** Bar graph of Tunel-positive cells in the retinal ONL. Rats were divided into the following groups: (i) not exposed to light damage (LD) and non-treated, (ii) not exposed to LD and treated with CA, (iii) exposed to LD and treated with CA, and (iv) exposed to LD and treated with vehicle ( $n = 8$  total). TUNEL-positive cells were counted in 14 targeted fields within each retina chosen to cover the area most susceptible to light damage. Values represent mean  $\pm$  SEM (\*\*\*\* $P < 0.0001$  by one-way ANOVA). GraphPad Prism 5 software was used for data analysis and graphical representation.

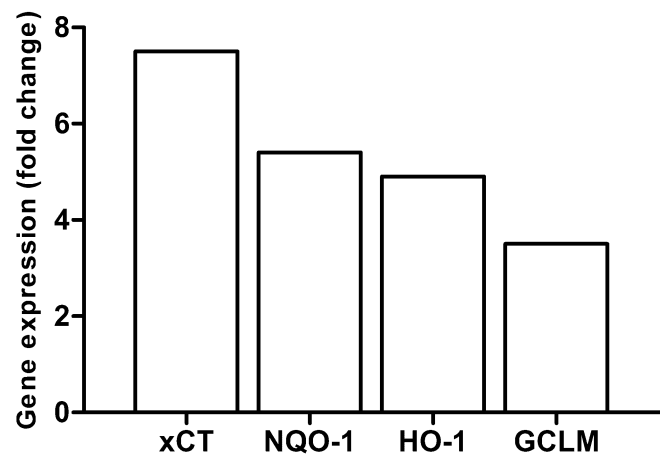

Figure S1

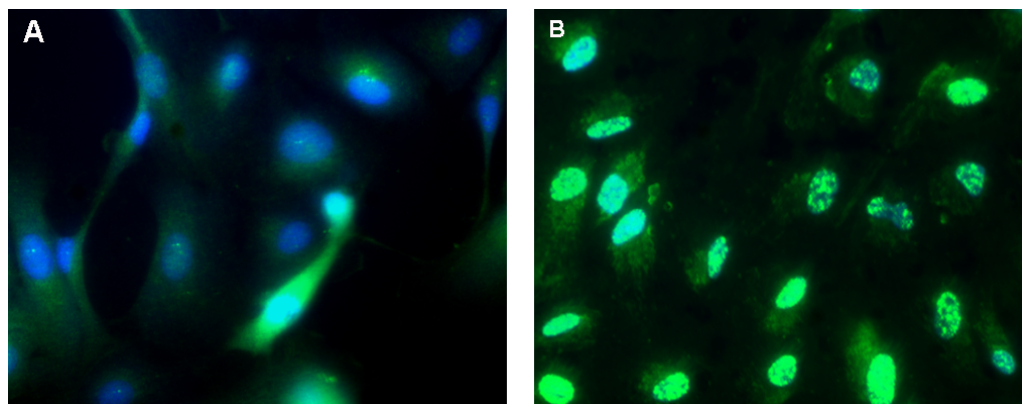

Figure S2

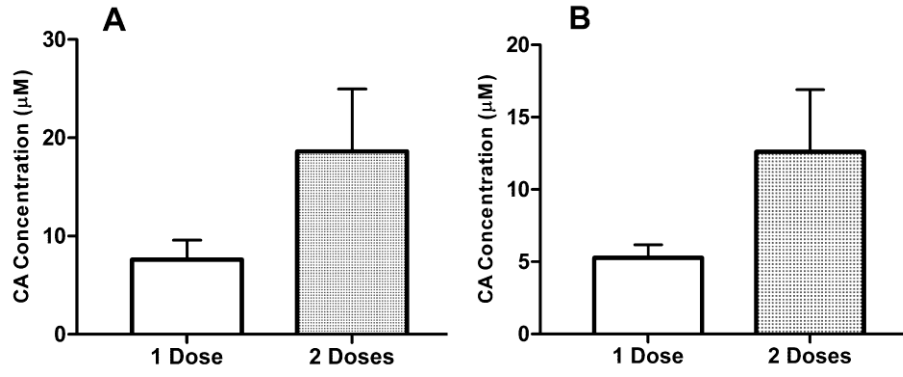

Figure S3

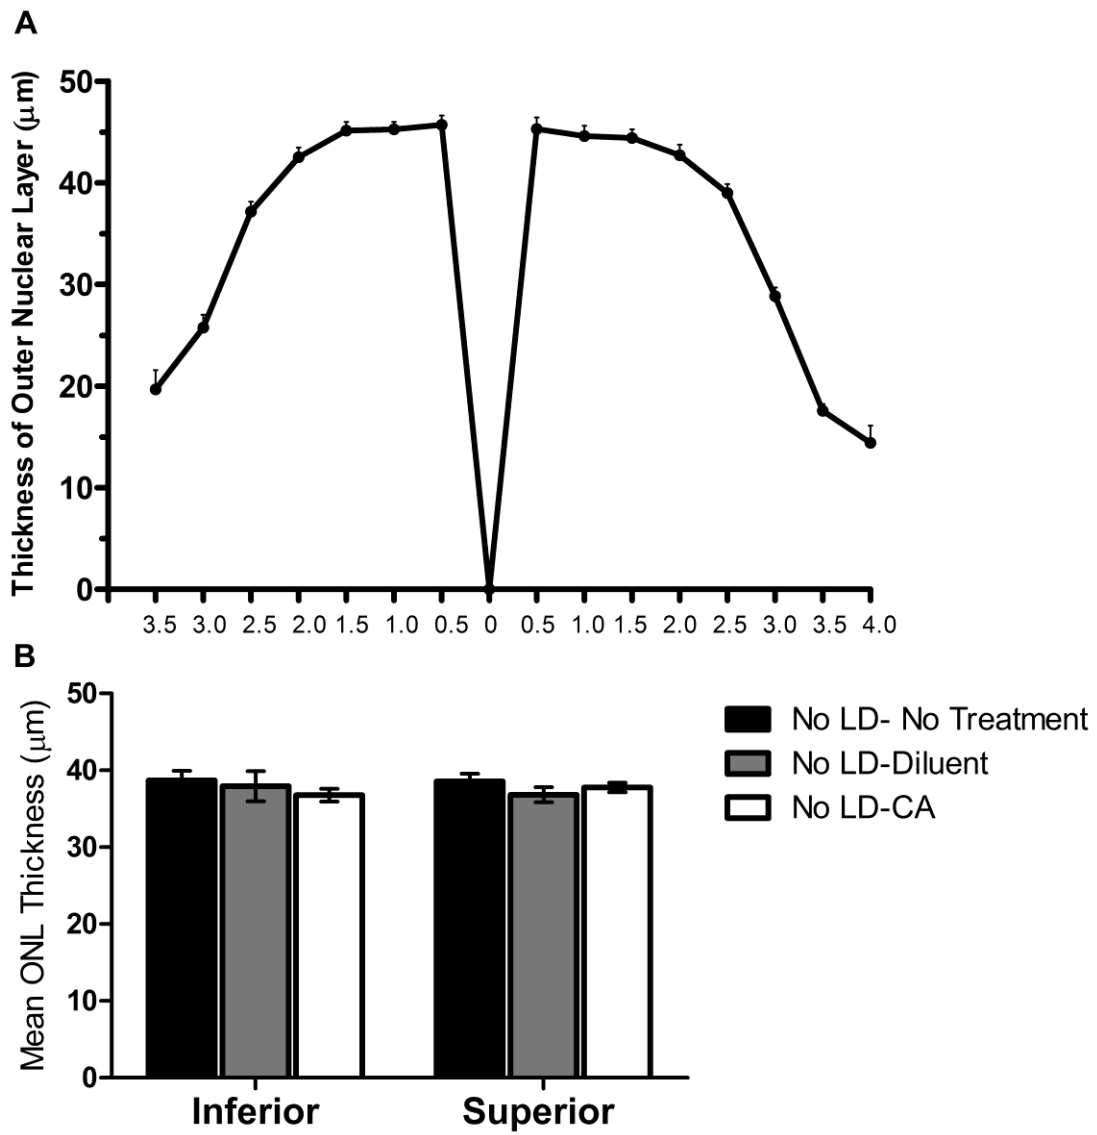

Figure S4

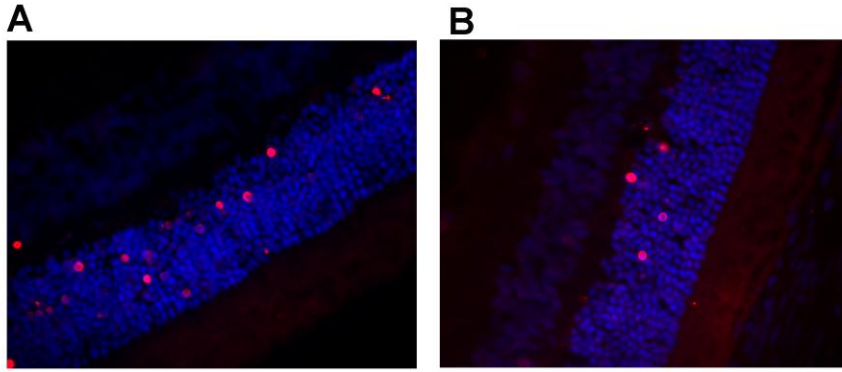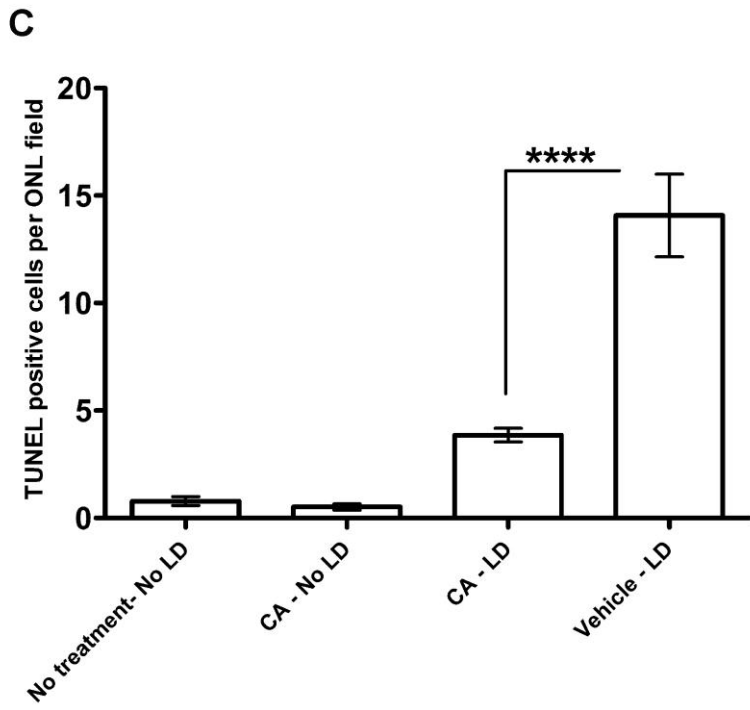

Figure S5
